# Supplementary material
Source: PubMed Central journal article supplement (PMC4050636)
Supplement: NIHMS574781-supplement-Supplemental_Material.pdf [file NIHMS574781-supplement-Supplemental_Material.pdf]

## **SUPPLEMENTAL MATERIAL**

**Table S1. Empirical risk scores for stroke and bleeding in patients with atrial fibrillation.**

---

| <b>Stroke or Systemic Embolism</b> |                                                                                                                                                                                                                        |
|------------------------------------|------------------------------------------------------------------------------------------------------------------------------------------------------------------------------------------------------------------------|
| CHADS <sub>2</sub>                 | <ul style="list-style-type: none"><li>• <u>C</u>ongestive heart failure</li><li>• <u>H</u>ypertension</li><li>• <u>A</u>ge<sub>≥</sub>75</li><li>• <u>D</u>iabetes</li><li>• <u>S</u>troke or TIA (2 points)</li></ul> |

---

| <b>Bleeding</b> |                                                                                                                                                                                                                          |
|-----------------|--------------------------------------------------------------------------------------------------------------------------------------------------------------------------------------------------------------------------|
| ATRIA           | <ul style="list-style-type: none"><li>• Anemia (3 points)</li><li>• Severe renal disease (3 points)</li><li>• Age<sub>≥</sub>75 (2 points)</li><li>• Prior bleeding (1 point)</li><li>• Hypertension (1 point)</li></ul> |

TIA: transient ischemic attack

**Table S2. Distribution of empirical populations.**

| Risk Level   | Empirical Score       | Stroke Risk                             |                                             |                          | Bleeding Risk        |                   |                                     |                          |
|--------------|-----------------------|-----------------------------------------|---------------------------------------------|--------------------------|----------------------|-------------------|-------------------------------------|--------------------------|
|              |                       | Adjusted CHADS <sub>2</sub> Stroke Rate | CHADS <sub>2</sub> Distribution, % patients | ORBIT-AF Distribution, % | Empirical Score      | ATRIA Event Rates | ATRIA Distribution, % patient-years | ORBIT-AF Distribution, % |
| Low          | CHADS <sub>2</sub> =0 | 1.9                                     | 7%                                          | 6%                       | ATRIA <sub>≤</sub> 3 | 0.76              | 83%                                 | 74%                      |
| Intermediate | CHADS <sub>2</sub> =1 | 2.8                                     | 27%                                         | 22%                      | ATRIA=4              | 2.62              | 7%                                  | 9%                       |
| High         | CHADS <sub>2</sub> ≥2 | 3.6-44                                  | 66%                                         | 72%                      | ATRIA <sub>≥</sub> 5 | 5.75              | 10%                                 | 17%                      |

Alignment among risk levels and empirical risk score, with event rates recorded in the derivation populations, as well as the distribution of patients in both the derivation and ORBIT-AF populations.

**Table S3. Candidate co-variates for the multivariable models.**

**Demographics**

1. Age, years
2. Race – African American/Hispanic/White/Others
3. Gender – Male/Female
4. Level of Education – Some School/High School Graduate/College Graduate/Post Graduate
5. Paylor/Insurance – Medicare or Medicaid/private/Others

**Medical History**

1. Smoking – Current/Recent or Former/Non-smoker
2. Cancer – Yes/No
3. Hypertension – Yes/No
4. Osteoporosis – Yes/No
5. Diabetes – Yes/No
6. Hip Fracture – Yes/No
7. Hyperthyroidism – Yes/No
8. Hypothyroidism – Yes/No
9. GI Bleed – Yes/No
10. Obstructive Sleep Apnea – Yes/No
11. Dialysis – Yes/No
12. Hyperlipidemia – Yes/No
13. Anemia – Yes/No
14. Cognitive Impairment/Dementia – Yes/No
15. Frailty – Yes/No
16. Liver Disease – Yes/No
17. COPD – Yes/No
18. Alcohol Abuse – Yes/No
19. Drug Abuse – Yes/No

**Cardiovascular History**

1. Family History of AF – Yes/No
2. Peripheral Vascular Disease – Yes/No
3. Sinus Node Dysfunction/Sick Sinus Syndrome – Yes/No
4. Stroke or TIA – Yes/No
5. Congestive Heart Failure (CHF) – No CHF/NYHA Class I/NYHA Class II/NYHA Class III or NYHA Class IV

6. Significant Valvular Disease – Yes/No
7. Prior Valve Replacement/Repair – Yes/No

### **Coronary Artery Disease History**

1. History of Coronary Artery Disease – Yes/No
2. Prior MI – Yes/No
3. Prior CABG – Yes/No
4. Any PCI – Yes/No

### **Vital Signs & AF status**

1. Height, cm
2. Weight, kg
3. Heart Rate, bpm
4. Diastolic Blood Pressure, mm Hg
5. Systolic Blood Pressure, mm Hg
6. Body Mass Index, kg/m<sup>2</sup> (For imputation purpose, we will impute individual components which are weight, height)
7. Intraventricular Conduction – RBBB/LBBB/Non-specific IVCD or Unknown-Ventricularly Paced/none

### **Echocardiographic Assessment (TTE or TEE)**

1. LVEF – Normal ( $\geq 50\%$ )/Mild dysfunction ( $>40\%$ ,  $<50\%$ )/Moderate dysfunction ( $\geq 30\%$ ,  $\leq 40\%$ )/Severe dysfunction ( $<30\%$ )
2. LAD Type – Normal/Mild enlargement/Moderate enlargement/Severe enlargement

### **Laboratory Data**

1. eGFR (MDRD), mg/dl (For imputation purpose, we will impute individual components which are age, gender, race, and serum creatinine)
2. Hemotocrit, % (fill in from Hemoglobin by Hemoglobin\*3 if missing)

### **Atrial Fibrillation Diagnosis**

1. Type of AF – First Detected or New Onset/Paroxysmal AF/Persistent AF /Permanent AF
2. EHRA Score – No symptoms/Mild/Severe/Disabling
3. AF management strategy – Rate Control/Rhythm Control
4. Prior Cardioversions – Yes/No

5. Prior antiarrhythmic drug – Yes/No
6. Catheter Ablation of AF – Yes/No
7. AV Node or HIS Bundle Ablation – Yes/No

**Functional Status**

1. Functional Status – Living independently/Living with assistance or Resides in assisted living facility or Resides in skilled nursing home or Bedbound

**Provider or Site**

1. PI/Site Specialty – Cardiology/Electrophysiology/Family Practice or Internal Medicine

**Table S4. Factors associated with the difference in provider-assessed and objective stroke risk.**

| <b>Risk Factor</b>                     | <b>Adjusted Estimate*<br/>(95% CI)</b> | <b>t-Value</b> | <b>P-value</b> | <b>Overall<br/>P-value</b> |
|----------------------------------------|----------------------------------------|----------------|----------------|----------------------------|
| Hypertension                           | -0.61 (-0.65,-0.56)                    | -28.38         | <.0001         |                            |
| NYHA Class I                           | -0.23 (-0.29,-0.17)                    | -7.09          | <.0001         | <.0001                     |
| 60 < Age <= 85 years (per 10 increase) | -0.15 (-0.18,-0.12)                    | -10.83         | <.0001         |                            |
| Diabetes                               | -0.14 (-0.20,-0.09)                    | -5.29          | <.0001         |                            |
| Primary Care Provider                  | -0.14 (-0.26,-0.03)                    | -2.44          | 0.0145         | 0.0095                     |
| Rhythm Control Management Strategy     | -0.06 (-0.09,-0.03)                    | -3.60          | 0.0003         |                            |
| Prior Catheter Ablation of AF          | -0.06 (-0.11,-0.00)                    | -2.07          | 0.0382         |                            |
| NYHA Class II                          | -0.05 (-0.10,0.00)                     | -1.95          | 0.0506         |                            |
| Weight > 100 kg (per 10 increase)      | -0.02 (-0.03,-0.01)                    | -4.42          | <.0001         |                            |
| NYHA Class III/IV                      | -0.01 (-0.07,0.05)                     | -0.31          | 0.7554         |                            |
| Prior Cardioversions                   | 0.03 (0.00,0.06)                       | 2.20           | 0.0279         |                            |
| EHRA Mild Symptom Score                | 0.03 (-0.00,0.06)                      | 1.70           | 0.0898         |                            |
| History of Any PCI                     | 0.04 (0.01,0.07)                       | 2.36           | 0.0185         |                            |
| History of CABG                        | 0.04 (0.00,0.08)                       | 2.13           | 0.0328         |                            |
| Significant Valvular Disease           | 0.05 (0.02,0.08)                       | 2.99           | 0.0028         |                            |
| Peripheral Vascular Disease            | 0.05 (0.02,0.09)                       | 2.79           | 0.0052         |                            |
| Age <= 60 years (per 10 increase)      | 0.05 (0.01,0.09)                       | 2.24           | 0.0248         |                            |
| Anemia                                 | 0.06 (0.02,0.10)                       | 2.85           | 0.0043         |                            |
| EHRA Severe Symptom Score              | 0.08 (0.02,0.14)                       | 2.69           | 0.0072         | 0.0221                     |
| EHRA Disabling Score                   | 0.09 (-0.02,0.20)                      | 1.63           | 0.1036         |                            |
| Frailty                                | 0.10 (0.02,0.17)                       | 2.63           | 0.0084         |                            |
| Electrophysiology Provider             | 0.10 (-0.07,0.27)                      | 1.16           | 0.2459         |                            |
| Not Living independently               | 0.12 (0.06,0.18)                       | 3.87           | 0.0001         |                            |
| Prior Stroke or TIA                    | 0.17 (0.10,0.23)                       | 5.25           | <.0001         |                            |

**Table S5. Factors associated with the difference in provider-assessed and objective bleeding risk.**

| <b>Risk Factor</b>                       | <b>Adjusted Estimate* (95% CI)</b> | <b>t-Value</b> | <b>P-value</b> | <b>Overall P-value</b> |
|------------------------------------------|------------------------------------|----------------|----------------|------------------------|
| Anemia                                   | -1.36 (-1.42,-1.30)                | -43.75         | <.0001         |                        |
| Dialysis                                 | -0.38 (-0.54,-0.22)                | -4.67          | <.0001         |                        |
| 65 < Age <= 80 years (per 10 increase)   | -0.11 (-0.15,-0.07)                | -5.44          | <.0001         |                        |
| Others Payer vs. Medicare or Medicaid    | -0.10 (-0.19,-0.01)                | -2.20          | 0.0278         |                        |
| Hematocrit, % (per 10 increase)          | -0.07 (-0.11,-0.04)                | -3.87          | 0.0003         |                        |
| Private Payer vs. Medicare or Medicaid   | -0.06 (-0.10,-0.02)                | -2.95          | 0.0032         | 0.0025                 |
| eGFR > 63 mg/dl(MDRD) (per 10 increase)  | -0.03 (-0.04,-0.01)                | -4.20          | 0.0001         |                        |
| Prior Cardioversions                     | 0.03 (0.01,0.06)                   | 2.31           | 0.0211         |                        |
| Significant Valvular Disease             | 0.05 (0.01,0.09)                   | 2.42           | 0.0156         |                        |
| Obstructive Sleep Apnea                  | 0.05 (0.01,0.08)                   | 2.31           | 0.0208         |                        |
| Age <= 65 years (per 10 increase)        | 0.06 (0.03,0.10)                   | 3.42           | 0.0006         |                        |
| Diabetes                                 | 0.06 (0.02,0.10)                   | 3.16           | 0.0016         |                        |
| Peripheral Vascular Disease              | 0.06 (0.01,0.10)                   | 2.62           | 0.0087         |                        |
| NYHA Class I                             | 0.07 (0.02,0.12)                   | 2.61           | 0.0090         |                        |
| History of Coronary Artery Disease       | 0.09 (0.05,0.12)                   | 4.97           | <.0001         |                        |
| eGFR <= 63 mg/dl(MDRD) (per 10 increase) | 0.10 (0.08,0.12)                   | 9.31           | <.0001         |                        |
| Prior Stroke or TIA                      | 0.10 (0.06,0.14)                   | 4.70           | <.0001         |                        |
| NYHA Class II                            | 0.13 (0.08,0.18)                   | 5.31           | <.0001         | <.0001                 |
| Alcohol Abuse                            | 0.13 (0.06,0.20)                   | 3.72           | 0.0002         |                        |
| Frailty                                  | 0.13 (0.05,0.22)                   | 3.23           | 0.0012         |                        |
| Primary Care Provider                    | 0.13 (0.01,0.24)                   | 2.21           | 0.0270         | 0.0338                 |
| Not Living independently                 | 0.15 (0.08,0.21)                   | 4.57           | <.0001         |                        |
| GI Bleed                                 | 0.17 (0.10,0.24)                   | 4.71           | <.0001         |                        |
| Electrophysiology Provider               | 0.17 (-0.00,0.34)                  | 1.93           | 0.0531         |                        |
| NYHA Class III/IV                        | 0.18 (0.11,0.25)                   | 5.05           | <.0001         |                        |
